# Supplementary material
Source: Elsevier journal article supplement (https://www.sciencedirect.com/science/article/pii/S0301054619301181)
Supplement: mmc1 [file S0301054619301181:mmc1.docx]

Table S1 Associations between total IgE and 25(OH)D levels in children aged 1 and 2 years.

| Serum levels of total IgE | Serum levels of 25(OH)D, Mean ± SD | *F* value | *P* value |
| --- | --- | --- | --- |
| <100 IU/Ml (n=1743) | 87.92 ± 28.05 | 11.103 | <0.001 |
| 100-200 IU/mL (n=363) | 86.80 ± 27.22 |
| >200 IU/mL (n=536) | 81.54 ± 25.53 |

Table S2 Associations between antigen-specific IgE levels and 25(OH)D levels in children

| Allergen | Adjusted OR (95% CI) 25(OH)D < 75 nmol/L compared with the reference group (≥75 nmol/L) | *P* value | Adjusted OR (95% CI) 25(OH)D < 50 nmol/L compared with the reference group (≥75 nmol/L) | *P* value |
| --- | --- | --- | --- | --- |
| *Dermatophagoides farinae* | 1.121 (0.810, 1.553) | 0.491 | 1.005 (0.411, 2.093) | 0.667 |
| *Dermatophagoides pteronyssinus* | 0.588 (0.334, 1.034) | 0.065 | 0.653 (0.489, 1.013) | 0.101 |
| Mulberry | 1.625 (0.851, 3.102) | 0.141 | 1.314 (0.675, 2.454) | 0.202 |
| Cat | 0.869 (0.727, 1.039) | 0.123 | 0.962 (0.880, 1.051) | 0.390 |
| Dog | 0.726 (0.565, 0.933) | 0.012 | 0.541 (0.307, 0.955) | 0.034 |
| Cockroach | 0.777 (0.414, 1.429) | 0.433 | 0.599 (0.142, 2.531) | 0.485 |
| Amaranth | 1.033 (0.749, 1.423) | 0.844 | 0.845 (0.442, 1.614) | 0.610 |
| Egg | 0.820 (0.641, 1.049) | 0.114 | 0.861 (0.502, 1.478) | 0.587 |
| Milk | 0.568 (0.294, 1.098) | 0.093 | 0.627 (0.430, 0.914) | 0.015 |
| Shrimp | 0.951 (0.771, 1.173) | 0.639 | 0.538 (0.209, 1.387) | 0.201 |
| Beef | 0.755 (0.298, 1.916) | 0.554 | 0.810 (0.491, 1.337) | 0.410 |
| Shellfish | 0.834 (0.131, 5.311) | 0.848 | 0.797 (0.277, 2.296) | 0.996 |
| Crab | 0.761 (0.470, 1.233) | 0.268 | 0.706 (0.289, 1.724) | 0.444 |
| Mango | 1.368 (0.639, 2.931) | 0.420 | 3.058 (0.968, 9.665) | 0.057 |
| Cashew nut | 1.012 (0.729, 1.405) | 0.943 | 1.187 (0.632, 2.232) | 0.594 |
| Pineapple | 1.584 (0.676, 3.712) | 0.290 | 0.745 (0.091, 6.125) | 0.784 |
| Aspergillus species | 0.999 (0.666, 1.499) | 0.997 | 0.967 (0.448,2.091) | 0.933 |
| Ragweed | 1.239 (0.577, 2.663) | 0.582 | 0.357 (0.035,3.692) | 0.388 |
| Birch | 0.941 (0.612, 1.448) | 0.784 | 1.095 (0.483,2.483) | 0.827 |
